# Supplementary material for: What Types of Chemical Problems Benefit from Density-Corrected DFT? A Probe Using an Extensive and Chemically Diverse Test Suite
Source: PubMed Central journal article supplement (PMC8028055; doi:10.1021/acs.jctc.0c01055), 2021-02-24
Supplement: ct0c01055_si_001.pdf [file ct0c01055_si_001.pdf]

## **Electronic Supporting Information**

What types of chemical problems benefit from density-corrected DFT?

A probe using an extensive and chemically diverse test suite

*Golokesh Santra and Jan M.L. Martin\**

Department of Organic Chemistry, Weizmann Institute of Science, 7610001 Rehovot, Israel.

Email: [gershom@weizmann.ac.il](mailto:gershom@weizmann.ac.il)

**Table S1: Abbreviations used and their descriptions**

| Abbreviation                  | Description                                                                                                                                                                       |
|-------------------------------|-----------------------------------------------------------------------------------------------------------------------------------------------------------------------------------|
| ACONF <sup>1</sup>            | Relative energies of alkane conformers                                                                                                                                            |
| ADIM6 <sup>2</sup>            | Interaction energies of n-alkane dimers                                                                                                                                           |
| AHB21 <sup>3</sup>            | Interaction energies in anion–neutral dimers                                                                                                                                      |
| AL2X6 <sup>4</sup>            | Dimerisation energies of AlX <sub>3</sub> compounds                                                                                                                               |
| ALK8 <sup>4</sup>             | Dissociation and other reactions of alkaline compounds                                                                                                                            |
| ALKBDE10 <sup>5</sup>         | Dissociation energies in group-1 and -2 diatomics                                                                                                                                 |
| AMINO20X4 <sup>6</sup>        | Relative energies in amino acid conformers                                                                                                                                        |
| BH76RC <sup>7</sup>           | Barrier heights of hydrogen transfer, heavy atom transfer, nucleophilic substitution, unimolecular and association reactions                                                      |
| BH76 <sup>8,9,7</sup>         | Reaction energies of the BH7610,11,23 set                                                                                                                                         |
| BHDIV10 <sup>4</sup>          | Diverse reaction barrier heights                                                                                                                                                  |
| BHPERI <sup>4,10,11,12</sup>  | Barrier heights of pericyclic reactions                                                                                                                                           |
| BHROT27 <sup>4</sup>          | Barrier heights for rotation around single bonds                                                                                                                                  |
| BSR36 <sup>13,14</sup>        | Bond-separation reactions of saturated hydrocarbons                                                                                                                               |
| BUT14DIOL <sup>15</sup>       | Relative energies in butane-1,4-diol conformers                                                                                                                                   |
| C60ISO <sup>16</sup>          | Relative energies between C60 isomers                                                                                                                                             |
| CARBHB12 <sup>4</sup>         | Hydrogen-bonded complexes between carbene analogues and H <sub>2</sub> O, NH <sub>3</sub> , or HCl                                                                                |
| CDIE20 <sup>17</sup>          | Double-bond isomerisation energies in cyclic systems                                                                                                                              |
| CHB6 <sup>3</sup>             | Interaction energies in cation–neutral dimers                                                                                                                                     |
| DARC <sup>7,18</sup>          | Reaction energies of Diels–Alder reactions                                                                                                                                        |
| DC13 <sup>19,7,20,21–29</sup> | 13 difficult cases for DFT methods                                                                                                                                                |
| DIPCS10 <sup>4</sup>          | Double-ionisation potentials of closed-shell systems                                                                                                                              |
| FH51 <sup>30,31</sup>         | Reaction energies in various (in-)organic systems                                                                                                                                 |
| G21EA <sup>7,32</sup>         | Adiabatic electron affinities                                                                                                                                                     |
| G21IP <sup>7,32</sup>         | Adiabatic ionisation potentials                                                                                                                                                   |
| G2RC <sup>7,33</sup>          | Reaction energies of selected G2/97 systems                                                                                                                                       |
| HAL59 <sup>34,35</sup>        | Binding energies in halogenated dimers (incl. halogen bonds)                                                                                                                      |
| HEAVY28 <sup>9</sup>          | Noncovalent interaction energies between heavy element hydrides                                                                                                                   |
| HEAVYSB11 <sup>4</sup>        | Dissociation energies in heavy-element compounds                                                                                                                                  |
| ICONF <sup>4</sup>            | Relative energies in conformers of inorganic systems                                                                                                                              |
| IDISP <sup>7,36–39</sup>      | Intramolecular dispersion interactions                                                                                                                                            |
| IL16 <sup>3</sup>             | Interaction energies in anion–cation dimers                                                                                                                                       |
| INV24 <sup>40</sup>           | Inversion/racemisation barrier heights                                                                                                                                            |
| ISO34 <sup>36</sup>           | Isomerisation energies of small and medium-sized organic molecules                                                                                                                |
| ISOL24 <sup>41</sup>          | Isomerisation energies of large organic molecules                                                                                                                                 |
| MB16-43 <sup>4</sup>          | Decomposition energies of artificial molecules                                                                                                                                    |
| MCONF <sup>42</sup>           | Relative energies in melatonin conformers                                                                                                                                         |
| NBPRC <sup>7,38,43</sup>      | Oligomerisations and H <sub>2</sub> fragmentations of NH <sub>3</sub> /BH <sub>3</sub> systems; H <sub>2</sub> activation reactions with PH <sub>3</sub> /BH <sub>3</sub> systems |
| PA26 <sup>4</sup>             | Adiabatic proton affinities (incl. of amino acids)                                                                                                                                |
| PArel <sup>4</sup>            | Relative energies in protonated isomers                                                                                                                                           |
| PCONF21                       | Relative energies in tri- and tetrapeptide conformers                                                                                                                             |
| PNICO23 <sup>44</sup>         | Interaction energies in pnictogen-containing dimers                                                                                                                               |
| PX13 <sup>45</sup>            | Proton-exchange barriers in H <sub>2</sub> O, NH <sub>3</sub> , and HF clusters                                                                                                   |
| RC21 <sup>4</sup>             | Fragmentations and rearrangements in radical cations                                                                                                                              |
| RG18 <sup>4</sup>             | Interaction energies in rare-gas complexes                                                                                                                                        |

|                       |                                                                                                                                |
|-----------------------|--------------------------------------------------------------------------------------------------------------------------------|
| RSE43 <sup>46</sup>   | Radical-stabilisation energies                                                                                                 |
| S22 <sup>47</sup>     | Binding energies of noncovalently bound dimers                                                                                 |
| S66 <sup>48</sup>     | Binding energies of noncovalently bound dimers                                                                                 |
| SCONF <sup>7,49</sup> | Relative energies of sugar conformers                                                                                          |
| SIE4X4 <sup>50</sup>  | Self-interaction-error related problems                                                                                        |
| TAUT15 <sup>4</sup>   | Relative energies in tautomers                                                                                                 |
| UPU23 <sup>51</sup>   | Relative energies between RNA-backbone conformers                                                                              |
| W4-11 <sup>52</sup>   | Total atomisation energies                                                                                                     |
| WATER27 <sup>53</sup> | Binding energies in (H <sub>2</sub> O) <sub>n</sub> , H+(H <sub>2</sub> O) <sub>n</sub> and OH-(H <sub>2</sub> O) <sub>n</sub> |
| WCPT18 <sup>54</sup>  | Proton-transfer barriers in uncatalysed and water-catalysed reactions                                                          |
| YBDE18 <sup>55</sup>  | Bond-dissociation energies in ylides                                                                                           |

**Table S2: Original and Optimized D4 parameters for HF-DFT and self-consistent DFT functionals together with five major subcategories of total WTMAD2**

| Functionals                         | s <sub>6</sub> | a <sub>1</sub> | s <sub>8</sub> | a <sub>2</sub> | Five top level subsets |                         |                      |                     |                         | WTMAD2 |
|-------------------------------------|----------------|----------------|----------------|----------------|------------------------|-------------------------|----------------------|---------------------|-------------------------|--------|
|                                     |                |                |                |                | THERMO <sup>[a]</sup>  | BARRIERS <sup>[b]</sup> | LARGE <sup>[c]</sup> | CONF <sup>[d]</sup> | INTERMOL <sup>[e]</sup> |        |
| HF-PBE-D4                           | 1.0            | 0.5586         | 1.1145         | 3.6542         | 1.473                  | 1.372                   | 1.454                | 1.074               | 0.900                   | 6.273  |
| HF-PBE0-D4                          | 1.0            | 0.4909         | 1.0402         | 4.2328         | 1.232                  | 0.843                   | 1.227                | 0.927               | 0.786                   | 5.014  |
| HF-PBE38-D4                         | 1.0            | 0.4560         | 1.0815         | 4.5749         | 1.483                  | 0.758                   | 1.315                | 0.959               | 0.838                   | 5.353  |
| HF-PBE50-D4                         | 1.0            | 0.4042         | 0.7455         | 4.7098         | 1.717                  | 0.831                   | 1.486                | 0.997               | 0.985                   | 6.016  |
| HF-BLYP-D4                          | 1.0            | 0.4826         | 1.7143         | 3.2824         | 1.528                  | 1.121                   | 1.569                | 1.225               | 1.110                   | 6.553  |
| HF-B20LYP-D4                        | 1.0            | 0.4215         | 1.2898         | 3.6437         | 1.351                  | 0.663                   | 1.222                | 0.994               | 0.869                   | 5.100  |
| HF-B3LYP-D4                         | 1.0            | 0.4196         | 1.2556         | 3.7554         | 1.146                  | 0.675                   | 1.208                | 0.949               | 0.827                   | 4.804  |
| HF-B1LYP-D4                         | 1.0            | 0.4102         | 1.1892         | 3.7353         | 1.279                  | 0.600                   | 1.188                | 0.939               | 0.835                   | 4.840  |
| HF-B38LYP-D4                        | 1.0            | 0.3754         | 0.8643         | 3.8684         | 1.368                  | 0.613                   | 1.078                | 0.893               | 0.907                   | 4.860  |
| HF-BHLYP-D4                         | 1.0            | 0.3624         | 0.6822         | 3.9886         | 1.563                  | 0.879                   | 1.069                | 0.988               | 1.000                   | 5.499  |
| HF-TPSS-D4                          | 1.0            | 0.3303         | 1.3673         | 4.5177         | 1.424                  | 0.891                   | 1.566                | 0.853               | 0.975                   | 5.709  |
| HF-TPSSh-D4                         | 1.0            | 0.5162         | 1.4287         | 3.7716         | 1.375                  | 1.015                   | 1.362                | 0.841               | 0.848                   | 5.441  |
| HF-TPSS0-D4                         | 1.0            | 0.4743         | 1.2502         | 4.0521         | 1.449                  | 0.817                   | 1.214                | 0.755               | 0.859                   | 5.094  |
| HF-TPSS38-D4                        | 1.0            | 0.4198         | 0.7804         | 4.1058         | 1.605                  | 0.811                   | 1.260                | 0.767               | 0.938                   | 5.381  |
| HF-TPSS50-D4                        | 1.0            | 0.3928         | 0.7222         | 4.3802         | 1.894                  | 0.932                   | 1.387                | 0.885               | 1.027                   | 6.125  |
| HF-SCAN-D4                          | 1.0            | 0.1586         | 0.7155         | 7.4456         | 1.303                  | 1.045                   | 1.075                | 0.900               | 0.757                   | 5.079  |
| HF-SCAN10-D4                        | 1.0            | 0.2161         | 1.0159         | 7.3021         | 1.334                  | 0.898                   | 1.059                | 0.905               | 0.764                   | 4.960  |
| HF-SCAN0-D4                         | 1.0            | 0.2290         | 1.0482         | 7.2144         | 1.509                  | 0.786                   | 1.141                | 0.949               | 0.787                   | 5.172  |
| HF-SCAN38-D4                        | 1.0            | 0.2493         | 0.8788         | 6.9488         | 1.702                  | 0.767                   | 1.254                | 1.008               | 0.849                   | 5.579  |
| HF-SCAN50-D4                        | 1.0            | 0.2810         | 0.5959         | 6.4527         | 1.947                  | 0.849                   | 1.374                | 1.067               | 0.943                   | 6.181  |
| HF-mPW1K-D4                         | 1.0            | 1.1270         | 0.4163         | 4.4405         | 1.595                  | 0.771                   | 1.252                | 0.926               | 1.024                   | 5.569  |
| PBE-D4                              | 1.0            | 0.7233         | 4.7411         | 4.7199         | 2.052                  | 2.319                   | 2.114                | 1.812               | 1.618                   | 9.914  |
| PBE-D4 <sup>orig</sup> <sup>1</sup> | 1.0            | 0.3857         | 0.9595         | 4.8069         | 2.078                  | 2.407                   | 1.946                | 1.879               | 2.117                   | 10.426 |

<sup>1</sup> All “original” parameters are taken from ref<sup>56,57</sup>.

|                           |     |        |        |        |        |        |        |        |        |       |
|---------------------------|-----|--------|--------|--------|--------|--------|--------|--------|--------|-------|
| PBE0-D4                   | 1.0 | 0.5835 | 4.3194 | 5.3549 | 1.336  | 1.144  | 1.412  | 1.245  | 1.065  | 6.202 |
| PBE0-D4orig <sup>1</sup>  | 1.0 | 0.4009 | 1.2007 | 5.0293 | 1.361  | 1.204  | 1.342  | 1.245  | 1.267  | 6.418 |
| PBE38-D4                  | 1.0 | 0.5208 | 2.8361 | 5.2438 | 1.482  | 0.762  | 1.331  | 1.098  | 0.981  | 5.653 |
| PBE50-D4                  | 1.0 | 0.4424 | 1.9249 | 5.3064 | 1.714  | 0.641  | 1.395  | 1.074  | 1.024  | 5.848 |
| BLYP-D4                   | 1.0 | 0.4702 | 3.6496 | 4.6263 | 2.062  | 1.931  | 2.461  | 1.629  | 1.282  | 9.365 |
| BLYP-D4orig <sup>1</sup>  | 1.0 | 0.4449 | 2.3408 | 4.0933 | 2.006  | 2.066  | 2.188  | 1.851  | 1.493  | 9.603 |
| B20LYP-D4                 | 1.0 | 0.4355 | 2.1734 | 4.4258 | 1.4345 | 1.0656 | 1.7045 | 1.1361 | 0.9017 | 6.242 |
| B3LYP-D4                  | 1.0 | 0.4635 | 2.5224 | 4.5658 | 1.327  | 1.099  | 1.722  | 1.202  | 0.911  | 6.261 |
| B3LYP-D4orig <sup>1</sup> | 1.0 | 0.4087 | 2.0293 | 4.5381 | 1.301  | 1.124  | 1.610  | 1.235  | 1.096  | 6.366 |
| B1LYP-D4                  | 1.0 | 0.4296 | 1.8888 | 4.3733 | 1.376  | 0.900  | 1.548  | 1.045  | 0.849  | 5.717 |
| B1LYP-D4orig <sup>1</sup> | 1.0 | 0.3931 | 1.9855 | 4.5547 | 1.360  | 0.898  | 1.505  | 1.083  | 0.949  | 5.794 |
| B38LYP-D4                 | 1.0 | 0.3999 | 1.2738 | 4.2818 | 1.405  | 0.660  | 1.202  | 0.950  | 0.873  | 5.090 |
| BHLYP-D4                  | 1.0 | 0.3665 | 0.9499 | 4.4188 | 1.579  | 0.791  | 1.073  | 1.005  | 0.926  | 5.374 |
| BHLYP-D4orig <sup>1</sup> | 1.0 | 0.2726 | 1.6528 | 5.4863 | 1.601  | 0.839  | 1.192  | 1.074  | 0.940  | 5.646 |
| TPSS-D4                   | 1.0 | 0.5886 | 5.4374 | 5.0607 | 1.912  | 2.064  | 2.111  | 1.524  | 1.265  | 8.876 |
| TPSS-D4orig <sup>1</sup>  | 1.0 | 0.4282 | 1.7660 | 4.5426 | 1.819  | 2.177  | 1.862  | 1.726  | 1.629  | 9.213 |
| TPSSh-D4                  | 1.0 | 0.5634 | 4.4400 | 4.9713 | 2.068  | 1.616  | 1.748  | 1.267  | 1.110  | 7.809 |
| TPSSh-D4orig <sup>1</sup> | 1.0 | 0.4429 | 1.8590 | 4.6023 | 1.577  | 1.694  | 1.593  | 1.391  | 1.307  | 7.562 |
| TPSS0-D4                  | 1.0 | 0.5050 | 3.3687 | 5.0625 | 1.496  | 1.045  | 1.340  | 0.992  | 0.969  | 5.842 |
| TPSS0-D4orig <sup>1</sup> | 1.0 | 0.4033 | 1.6244 | 4.8054 | 1.504  | 1.103  | 1.246  | 1.054  | 1.102  | 6.008 |
| TPSS38-D4                 | 1.0 | 0.4652 | 2.6661 | 5.1069 | 1.613  | 0.764  | 1.244  | 0.916  | 0.939  | 5.477 |
| TPSS50-D4                 | 1.0 | 0.4144 | 1.6981 | 5.0215 | 1.858  | 0.808  | 1.304  | 0.917  | 1.001  | 5.887 |
| SCAN-D4                   | 1.0 | 0.1898 | 3.0789 | 9.0102 | 2.330  | 1.895  | 1.360  | 1.226  | 1.594  | 8.404 |
| SCAN-D4orig <sup>1</sup>  | 1.0 | 0.6293 | 1.4613 | 6.3128 | 2.331  | 1.898  | 1.347  | 1.237  | 1.708  | 8.521 |
| SCAN10-D4                 | 1.0 | 0.3149 | 6.4925 | 8.7697 | 1.531  | 1.510  | 1.228  | 1.105  | 1.419  | 6.793 |
| SCAN0-D4                  | 1.0 | 0.3750 | 6.1187 | 8.1124 | 1.549  | 1.040  | 1.192  | 1.001  | 1.198  | 5.980 |
| SCAN38-D4                 | 1.0 | 0.3996 | 5.0438 | 7.6249 | 1.691  | 0.768  | 1.256  | 0.997  | 1.075  | 5.788 |
| SCAN50-D4                 | 1.0 | 0.4108 | 3.2856 | 6.9783 | 1.901  | 0.754  | 1.377  | 1.055  | 1.051  | 6.138 |
| mPW1K-D4                  | 1.0 | 2.6336 | 0.4574 | 5.1437 | 1.506  | 0.603  | 1.220  | 1.042  | 1.038  | 5.409 |

<sup>[a]</sup>THERMO=Small Molecule Thermochemistry; <sup>[b]</sup>BARRIER=barrier heights; <sup>[c]</sup>LARGE=reaction energies for large systems;

<sup>[d]</sup>CONF=conformer/intramolecular interactions; and <sup>[e]</sup>INTERMOL=intermolecular interactions

**Table S3: Dispersion free HF-DFT and SC-DFT functionals together with five major subcategories of total WTMA2**

| Functionals | Five top level subsets |          |       |       |          | WTMA2  |
|-------------|------------------------|----------|-------|-------|----------|--------|
|             | THERMO                 | BARRIERS | LARGE | CONF  | INTERMOL |        |
| HF-PBE      | 1.570                  | 1.132    | 2.316 | 4.601 | 4.222    | 13.840 |
| HF-PBE0     | 1.246                  | 0.698    | 1.821 | 4.048 | 3.885    | 11.697 |
| HF-PBE38    | 1.458                  | 0.706    | 1.730 | 3.802 | 3.704    | 11.400 |
| HF-PBE50    | 1.671                  | 0.875    | 1.786 | 3.575 | 3.580    | 11.487 |
| HF-BLYP     | 2.212                  | 0.907    | 3.429 | 6.676 | 8.807    | 22.030 |
| HF-B20LYP   | 1.952                  | 0.814    | 2.855 | 5.730 | 7.258    | 18.610 |
| HF-B3LYP    | 1.660                  | 0.784    | 2.719 | 5.485 | 6.800    | 17.446 |
| HF-B1LYP    | 1.822                  | 0.838    | 2.714 | 5.478 | 6.847    | 17.699 |
| HF-B38LYP   | 1.784                  | 1.023    | 2.426 | 4.956 | 5.942    | 16.131 |
| HF-BHLYP    | 1.827                  | 1.273    | 2.218 | 4.428 | 5.027    | 14.773 |
| HF-TPSS     | 1.672                  | 0.910    | 2.712 | 5.232 | 5.710    | 16.235 |
| HF-TPSSh    | 1.555                  | 0.750    | 2.440 | 4.941 | 5.410    | 15.095 |
| HF-TPSS0    | 1.518                  | 0.714    | 2.086 | 4.546 | 5.022    | 13.886 |
| HF-TPSS38   | 1.608                  | 0.849    | 1.933 | 4.241 | 4.713    | 13.345 |
| HF-TPSS50   | 1.843                  | 1.088    | 1.874 | 3.961 | 4.413    | 13.179 |
| HF-SCAN     | 1.294                  | 0.988    | 1.283 | 1.880 | 2.026    | 7.472  |
| HF-SCAN10   | 1.331                  | 0.846    | 1.252 | 1.930 | 2.019    | 7.377  |
| HF-SCAN0    | 1.496                  | 0.739    | 1.304 | 2.041 | 2.060    | 7.640  |
| HF-SCAN38   | 1.683                  | 0.738    | 1.403 | 2.153 | 2.116    | 8.092  |
| HF-SCAN50   | 1.920                  | 0.859    | 1.529 | 2.273 | 2.192    | 8.774  |
| HF-mPW1K    | 1.577                  | 0.819    | 1.777 | 4.286 | 4.845    | 13.304 |
| PBE         | 2.083                  | 2.194    | 2.640 | 3.817 | 3.157    | 13.891 |
| PBE0        | 1.348                  | 1.044    | 1.886 | 3.477 | 3.151    | 10.905 |
| PBE38       | 1.466                  | 0.692    | 1.720 | 3.389 | 3.217    | 10.484 |
| PBE50       | 1.660                  | 0.674    | 1.722 | 3.324 | 3.335    | 10.715 |
| BLYP        | 2.373                  | 1.904    | 3.732 | 5.707 | 7.141    | 20.857 |
| B20LYP      | 1.777                  | 1.129    | 2.949 | 5.120 | 6.215    | 17.190 |
| B3LYP       | 1.586                  | 1.151    | 2.823 | 4.810 | 5.635    | 16.005 |
| B1LYP       | 1.709                  | 0.989    | 2.766 | 4.938 | 5.927    | 16.328 |
| B38LYP      | 1.694                  | 0.857    | 2.386 | 4.584 | 5.304    | 14.824 |
| BHLYP       | 1.776                  | 1.036    | 2.112 | 4.193 | 4.634    | 13.751 |
| TPSS        | 1.934                  | 1.898    | 2.894 | 4.374 | 4.537    | 15.636 |
| TPSSh       | 1.683                  | 1.465    | 2.545 | 4.206 | 4.443    | 14.342 |
| TPSS0       | 1.563                  | 0.973    | 2.093 | 4.014 | 4.377    | 13.020 |
| TPSS38      | 1.632                  | 0.786    | 1.872 | 3.885 | 4.316    | 12.491 |
| TPSS50      | 1.829                  | 0.937    | 1.780 | 3.768 | 4.245    | 12.558 |
| SCAN        | 2.308                  | 1.865    | 1.481 | 1.576 | 2.169    | 9.400  |
| SCAN10      | 1.522                  | 1.476    | 1.357 | 1.598 | 2.098    | 8.051  |
| SCAN0       | 1.540                  | 0.995    | 1.322 | 1.668 | 2.020    | 7.545  |
| SCAN38      | 1.672                  | 0.734    | 1.391 | 1.815 | 2.048    | 7.660  |
| SCAN50      | 1.875                  | 0.762    | 1.516 | 2.030 | 2.134    | 8.316  |
| mPW1K       | 1.497                  | 0.617    | 1.722 | 3.951 | 4.447    | 12.234 |

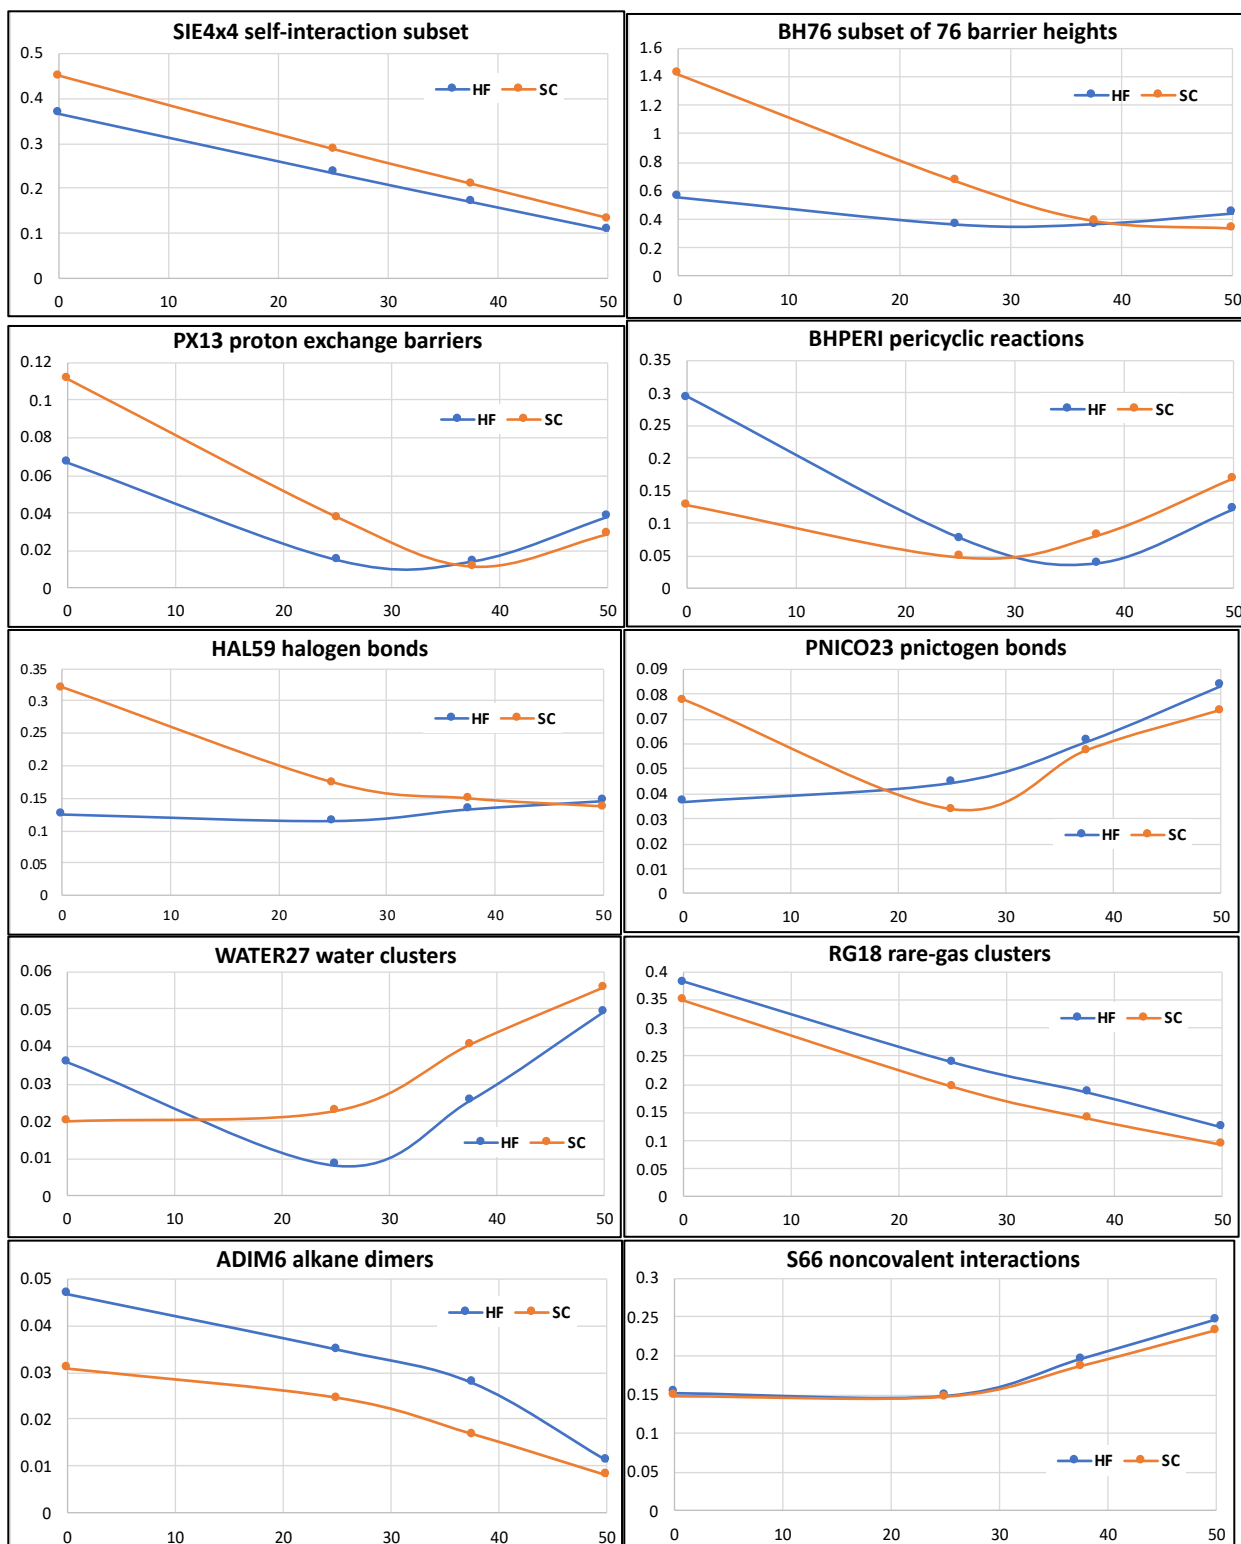

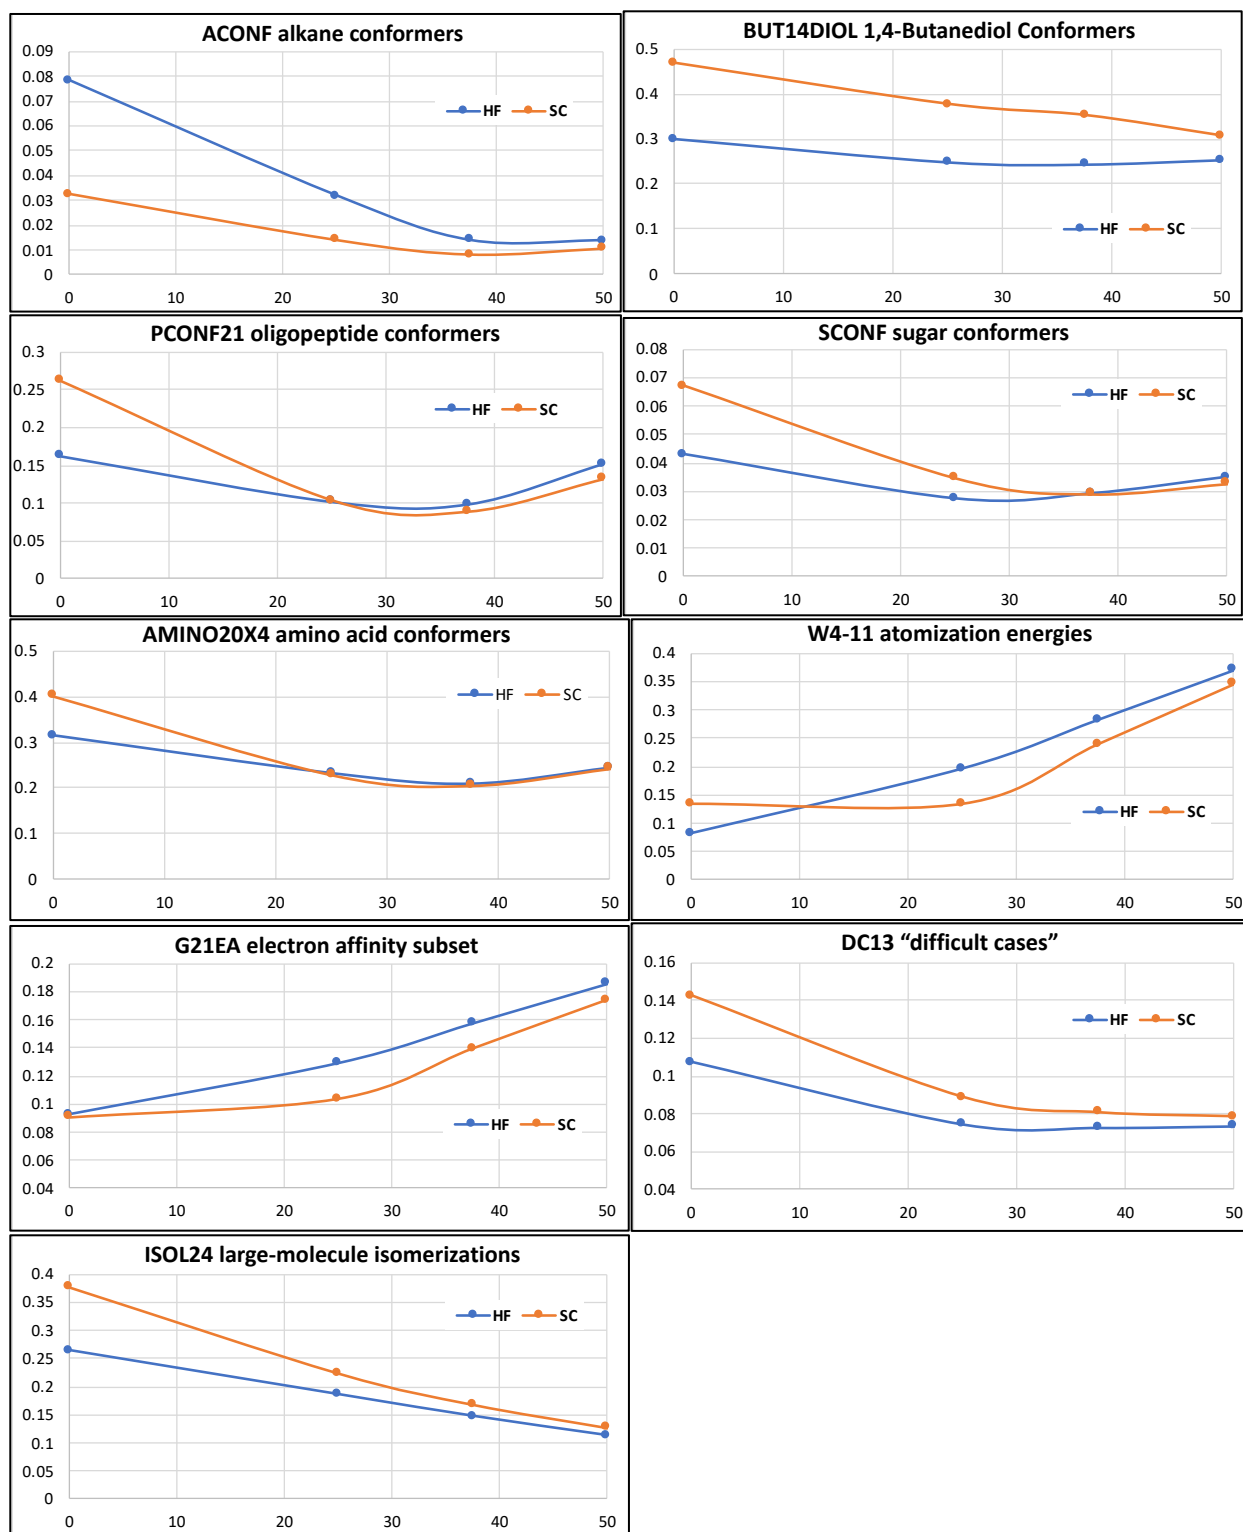

**Figure S1: Dependence on the percentage of HF exchange, for self-consistent *BnLYP-D4* and *HF-BnLYP-D4* of the WTMD2 (kcal/mol) contributions for the individual subsets SIE4x4, BH76, PX13, BHPERI, HAL59, PNICO23, W A TER27, RG18, ADIM6, S66, alkane conformers(ACONF), 1,4-butanediol conformers(BUT14DIOL), oligopeptide conformers**

(PCONF21), sugar conformers(SCONF), amino acid conformers(AMINO20X4), G21EA, W4-11, DC13 and large molecule isomerization(ISOL24) subsets.

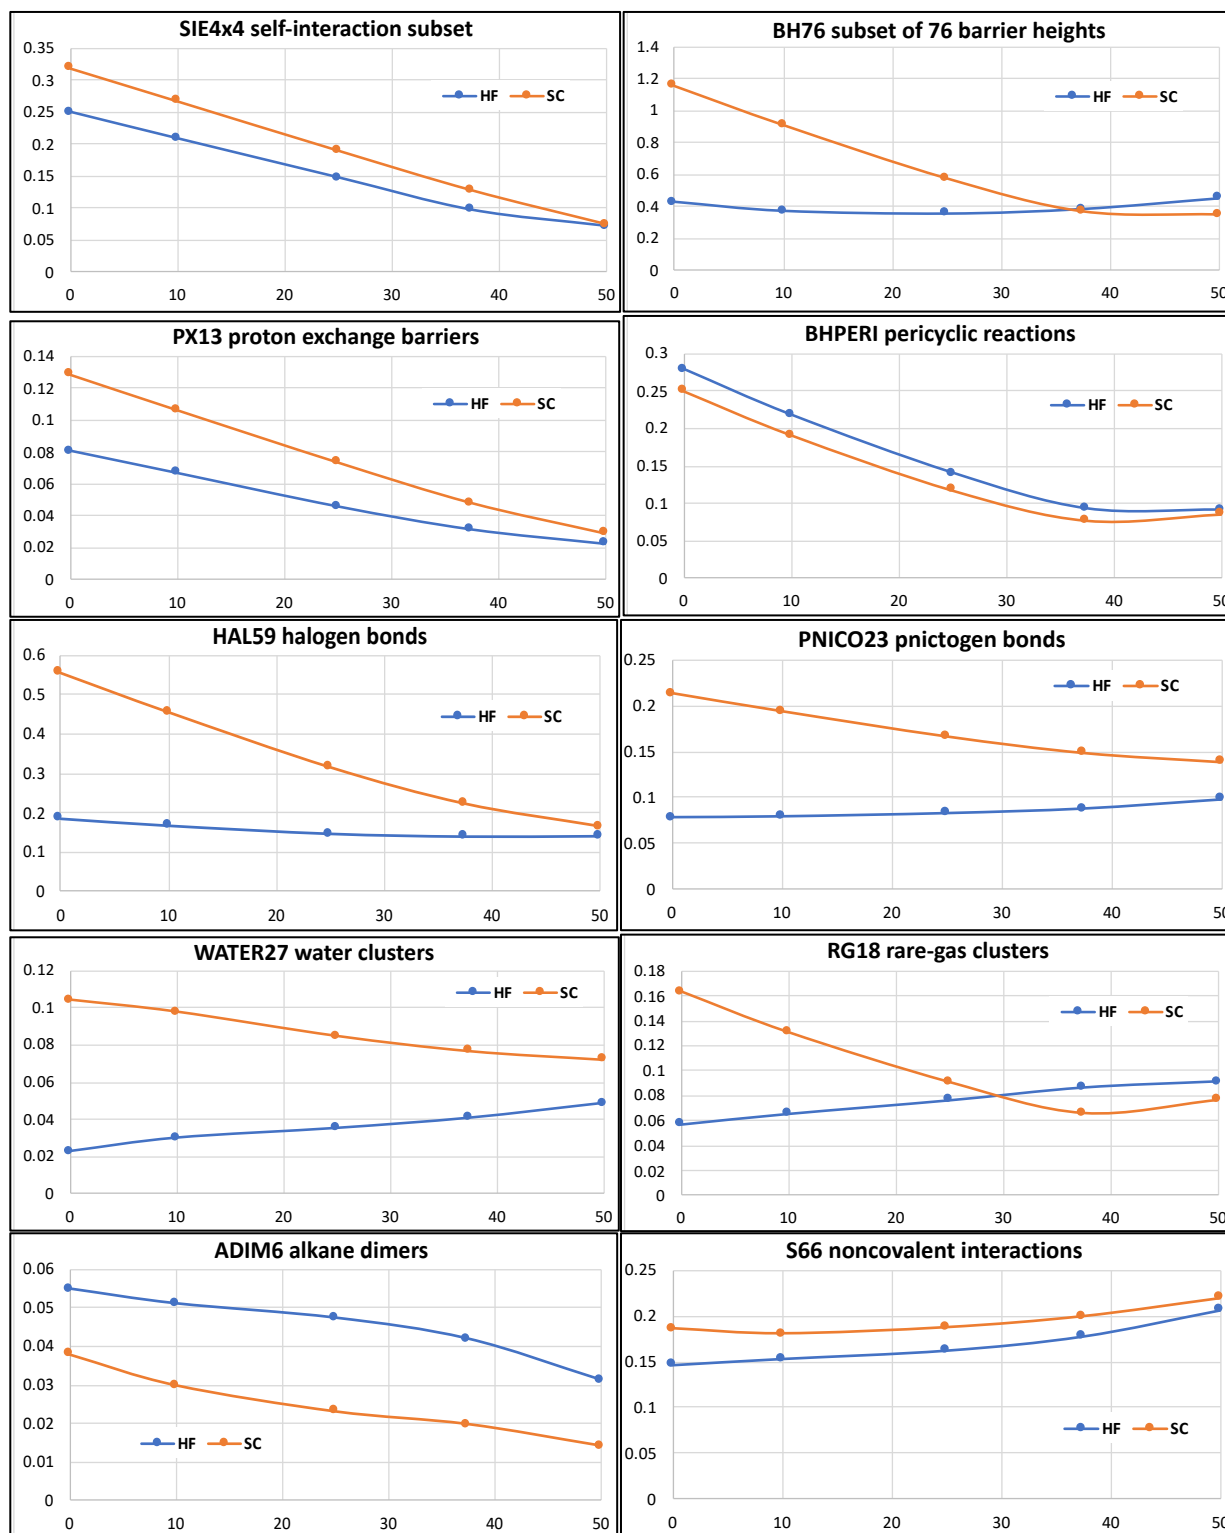



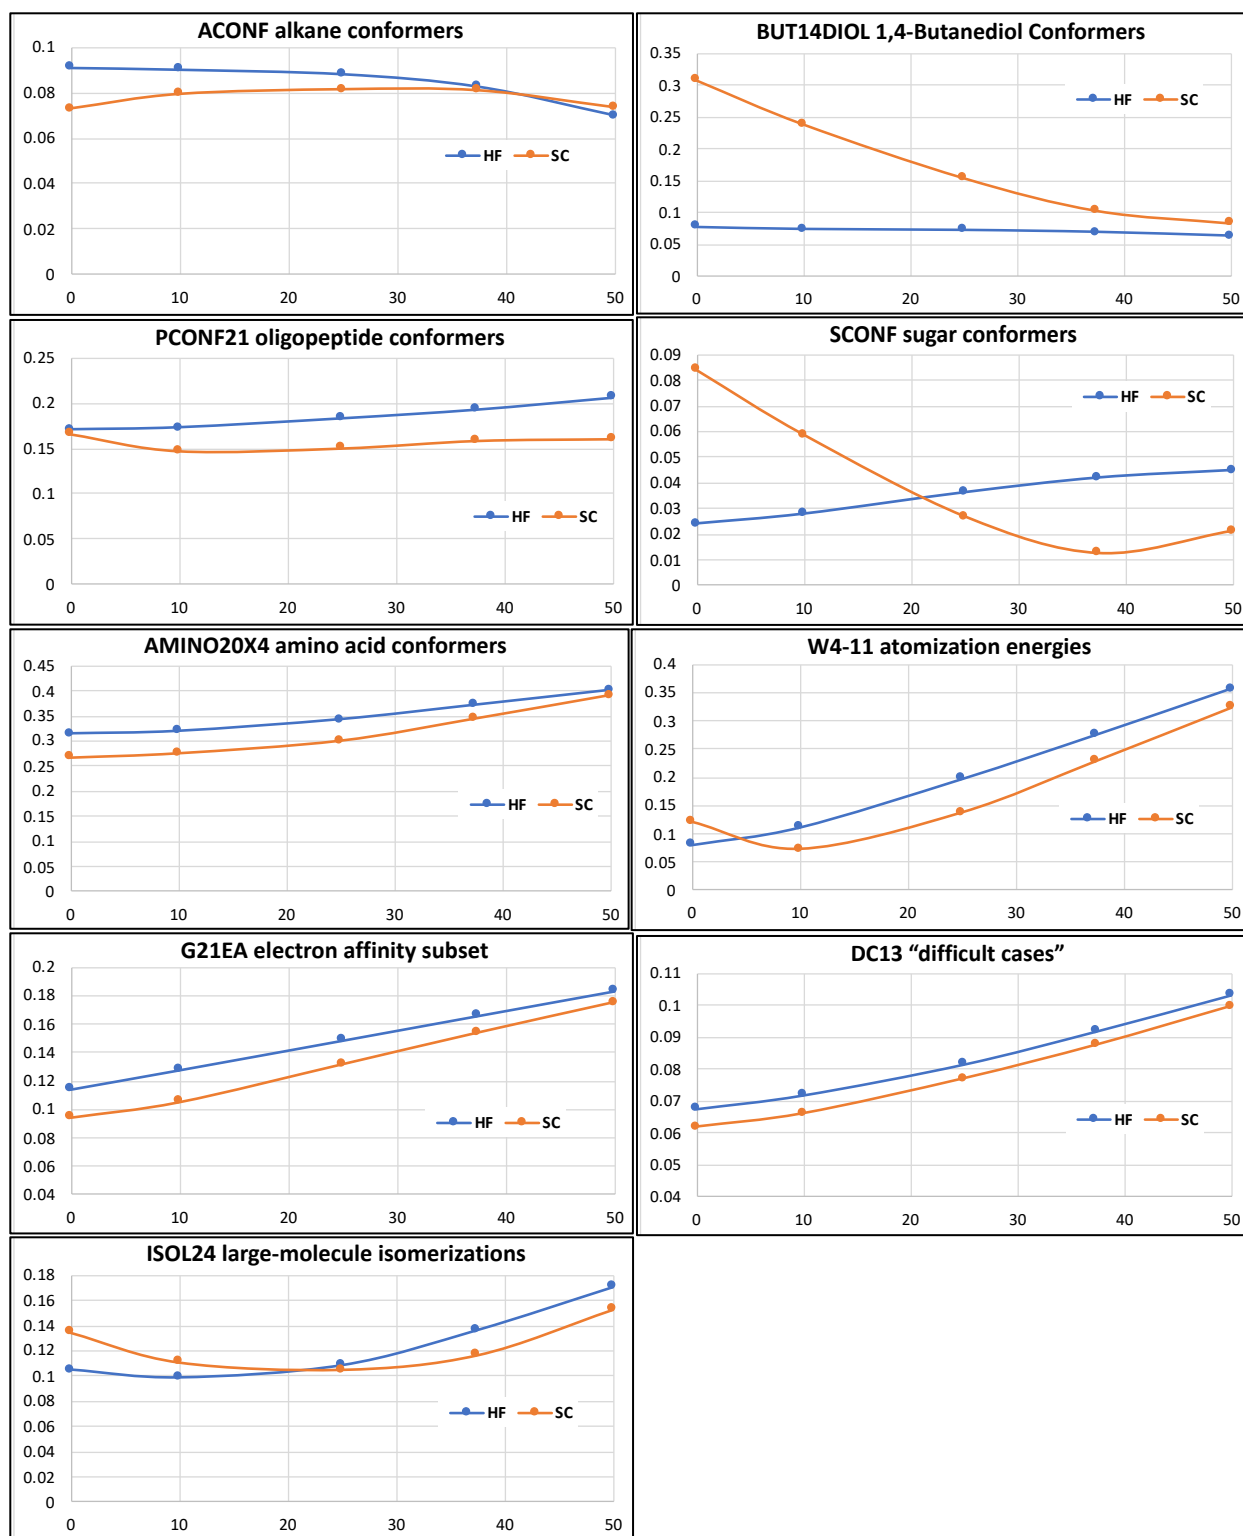

**Figure S2: Dependence on the percentage of HF exchange, for self-consistent SCAN $n$ -D4 and HF-SCAN $n$ -D4 of the WTMAD2 (kcal/mol) contributions for the individual subsets SIE4x4, BH76, PX13, BHPERI, HAL59, PNICO23, W A TER27, RG18, ADIM6, S66, alkane conformers(ACONF), 1,4-butanediol conformers(BUT14DIOL), oligopeptide conformers (PCONF21), sugar conformers(SCONF), amino acid conformers(AMINO20X4), G21EA, W4-11, DC13 and large molecule isomerization(ISOL24) subsets.**

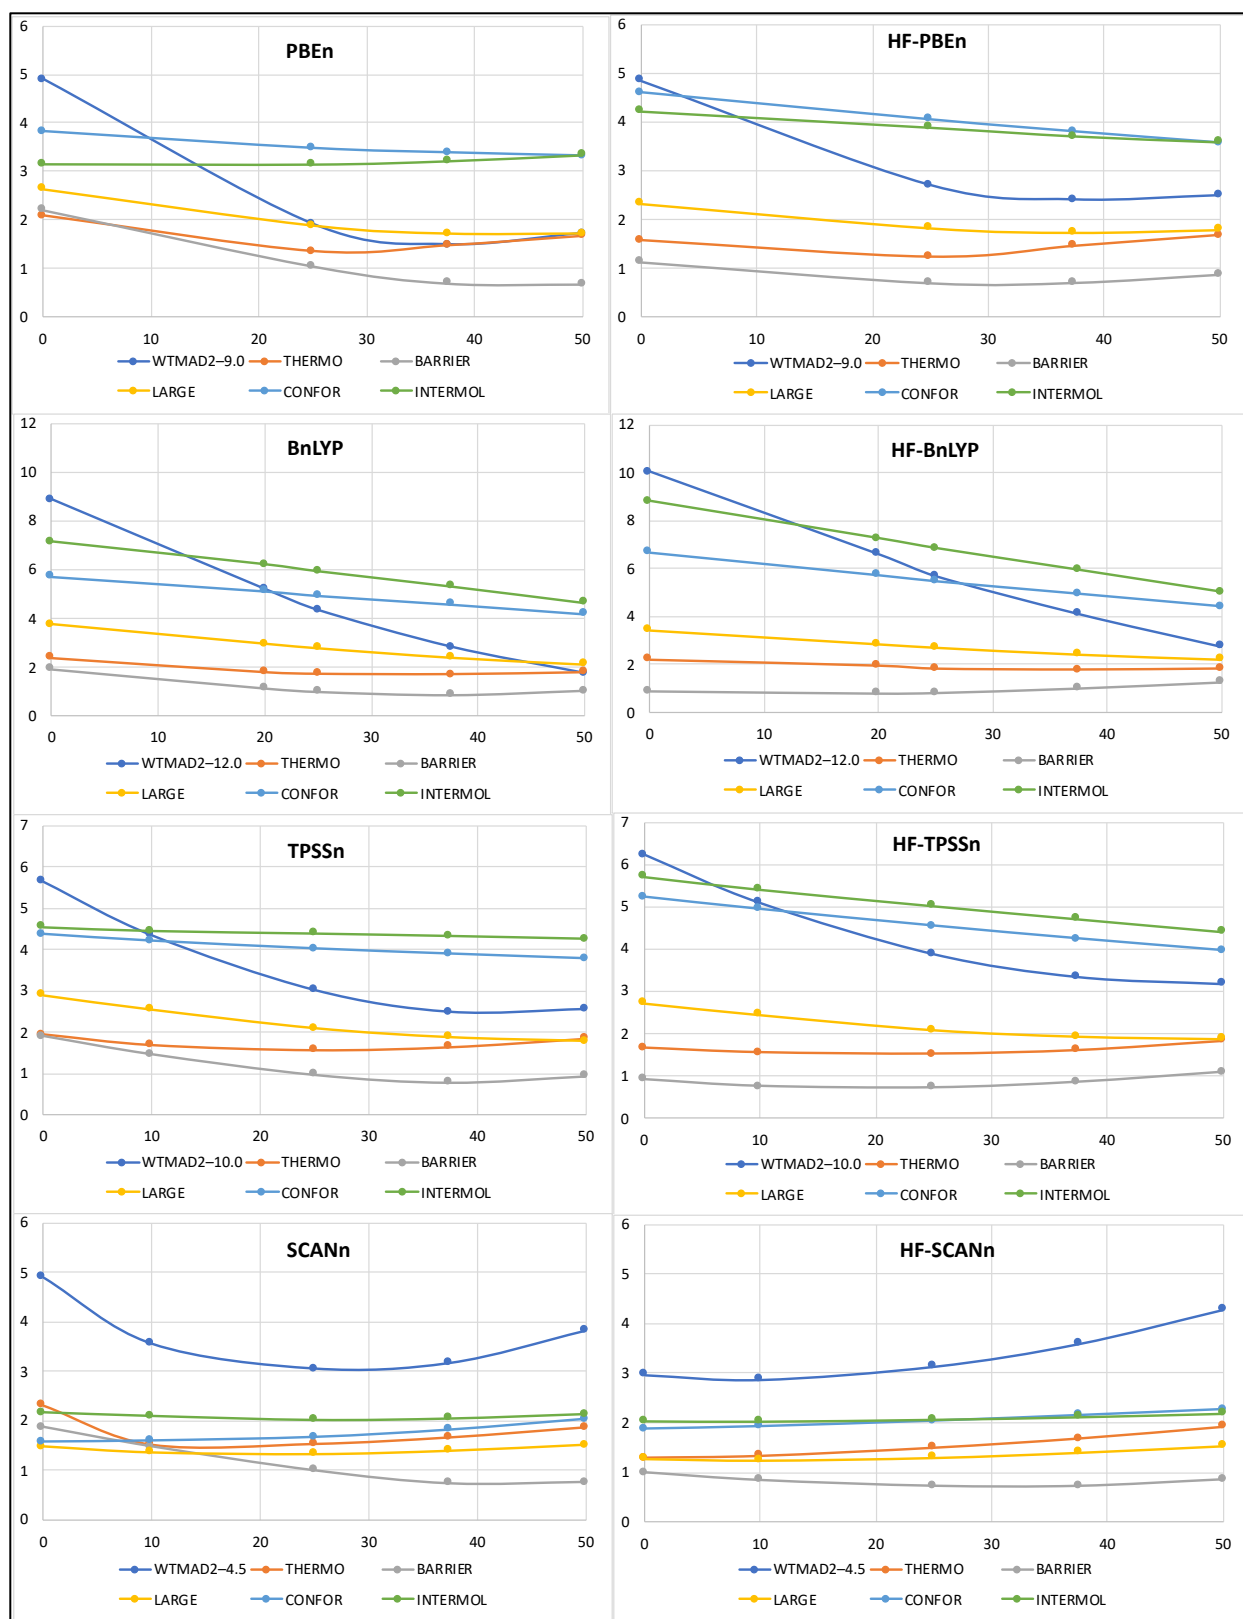

**Figure S3: Dependence of WTMAD2 (kcal/mol) and of the five top-level subsets on the percentage of HF exchange(x-axis) for dispersion free PBE, BLYP, TPSS and SCAN series.**

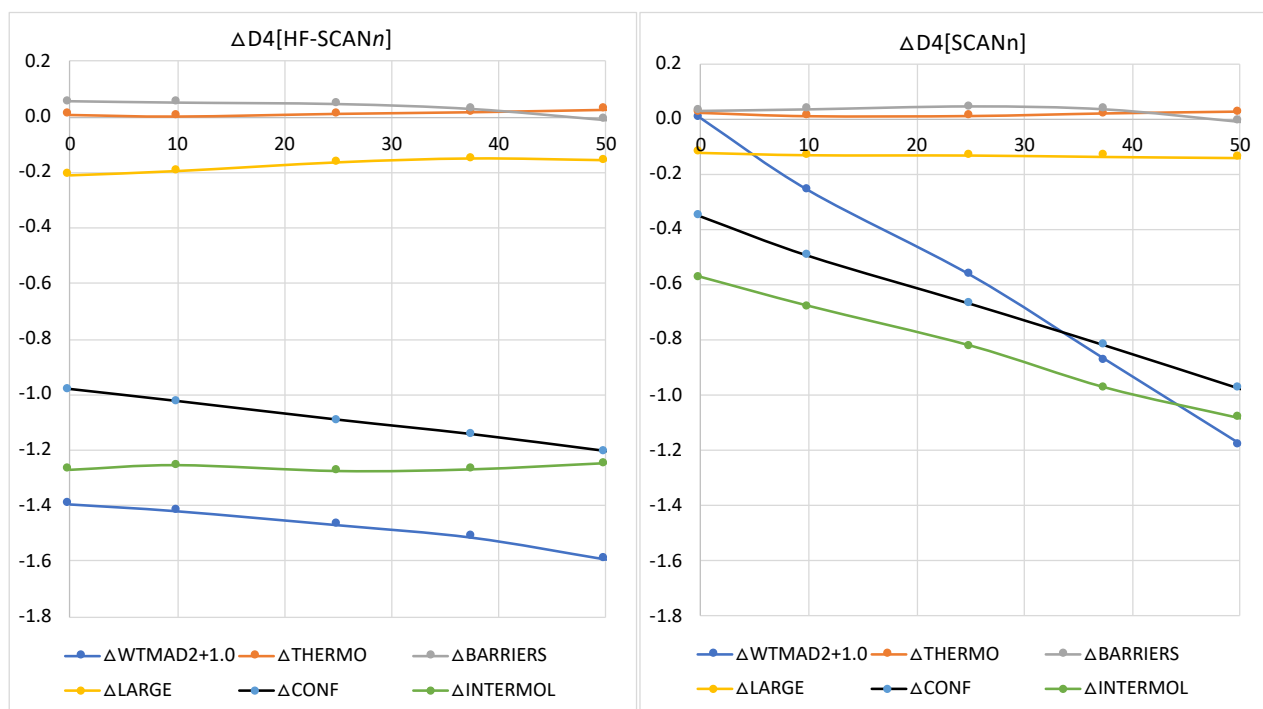

**Figure S4: The effect of considering D4 dispersion correction on top of SCAN $n$  and HF-SCAN $n$  for different percentage of HF exchange.**

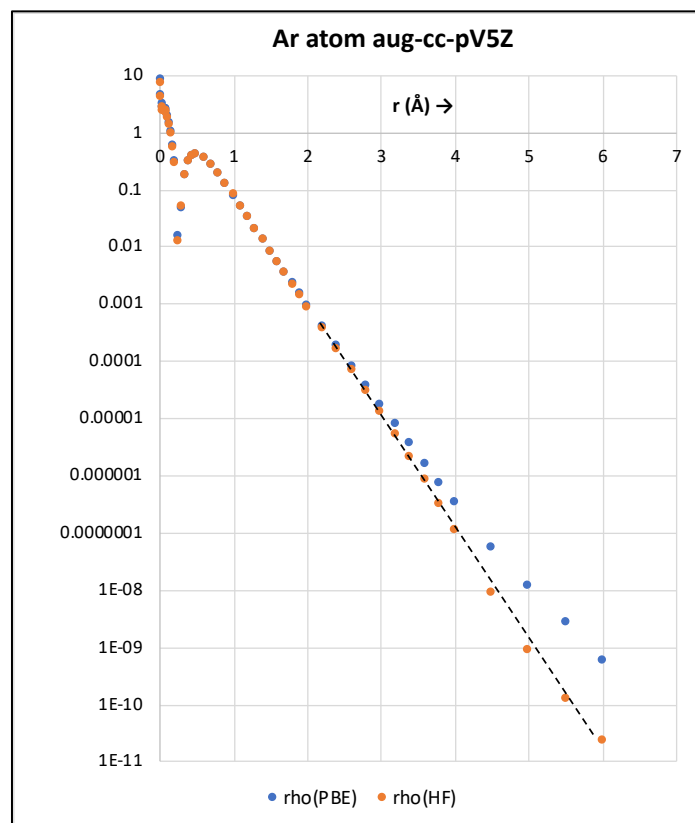

**Figure S5: Decay trend of pure HF density and self-consistent PBE density for Ar atom**

## HF-DFT

### A. Gaussian Sample Inputs:

#### 1. PBE-D3BJ

```
%chk=file.chk
#p hf nosymm Def2QZVPP guess=save

title

0 1
C 0.000000000000 0.000000000000 0.000000000000
O 0.000000000000 0.000000000000 1.131400000000

--Link1--

%chk=file.chk
#p empiricaldispersion=gd3bj pbepbe Def2QZVPP scf(maxcycle=-1)
geom=allcheck guess=read
```

#### 2. PBE38-D3BJ

```
%chk=file.chk
%mem=16gb
#p hf nosymm Def2QZVPP guess=save

title

0 1
C 0.000000000000 0.000000000000 0.000000000000
O 0.000000000000 0.000000000000 1.131400000000

--Link1--

%chk=file.chk
#p pbelpbe iop(3/78=1000010000,3/76=0625003750,3/77=1000010000)
# empiricaldispersion=gd3bj
iop(3/174=1000000,3/175=1462300,3/177=0399500,3/178=5140500)
# iop(8/117=-100)
# scf(maxcycle=-1) chkbas geom=allcheck guess=read
```

## B. ORCA Sample input:

### 1. TPSS-D3BJ

```
! UHF def2-QZVPP def2/J TightSCF NoPop XYZFILE

* xyz 0 1
C   0.000000000000      0.000000000000      0.000000000000
O   0.000000000000      0.000000000000      1.131400000000
*

$new_job
! UKS TPSS D3BJ def2-QZVPP def2/J grid5 moread NoPop

%scf
maxiter 1
tole 10000
tolg 10000
end

* xyzfile 0 1
```

### 2. TPSS38

```
! UHF def2-QZVPP def2/JK TightSCF NoPop XYZFILE

* xyz 0 1
C   0.000000000000      0.000000000000      0.000000000000
O   0.000000000000      0.000000000000      1.131400000000
*

$new_job
! UKS TPSS0 def2-QZVPP def2/JK grid5 moread NoPop

%method
Exchange X_TPSS
Correlation C_TPSS
ScalHFX 0.375
ScalDFX 0.625
ScalGGAC 1.0000
ScalLDAC 1.0000
end
```

```
%scf
maxiter 1
tole 10000
tolg 10000
end

* xyzfile 0 1
```

## References:

- (1) Gruzman, D.; Karton, A.; Martin, J. M. L. Performance of Ab Initio and Density Functional Methods for Conformational Equilibria of C<sub>n</sub>H<sub>2n+2</sub> Alkane Isomers (n = 4–8) †. *J. Phys. Chem. A* **2009**, *113*, 11974–11983.
- (2) Grimme, S.; Antony, J.; Ehrlich, S.; Krieg, H. A Consistent and Accurate Ab Initio Parametrization of Density Functional Dispersion Correction (DFT-D) for the 94 Elements H-Pu. *J. Chem. Phys.* **2010**, *132*, 154104.
- (3) Lao, K. U.; Schäffer, R.; Jansen, G.; Herbert, J. M. Accurate Description of Intermolecular Interactions Involving Ions Using Symmetry-Adapted Perturbation Theory. *J. Chem. Theory Comput.* **2015**, *11*, 2473–2486.
- (4) Goerigk, L.; Hansen, A.; Bauer, C.; Ehrlich, S.; Najibi, A.; Grimme, S. A Look at the Density Functional Theory Zoo with the Advanced GMTKN55 Database for General Main Group Thermochemistry, Kinetics and Noncovalent Interactions. *Phys. Chem. Chem. Phys.* **2017**, *19*, 32184–32215.
- (5) Yu, H.; Truhlar, D. G. Components of the Bond Energy in Polar Diatomic Molecules, Radicals, and Ions Formed by Group-1 and Group-2 Metal Atoms. *J. Chem. Theory Comput.* **2015**, *11*, 2968–2983.
- (6) Kesharwani, M. K.; Karton, A.; Martin, J. M. L. Benchmark Ab Initio Conformational Energies for the Proteinogenic Amino Acids through Explicitly Correlated Methods. Assessment of Density Functional Methods. *J. Chem. Theory Comput.* **2016**, *12*, 444–454.
- (7) Goerigk, L.; Grimme, S. A General Database for Main Group Thermochemistry, Kinetics, and Noncovalent Interactions – Assessment of Common and Reparameterized (Meta-)GGA Density Functionals. *J. Chem. Theory Comput.* **2010**, *6*, 107–126.
- (8) Zhao, Y.; Lynch, B. J.; Truhlar, D. G. Multi-Coefficient Extrapolated Density Functional Theory for Thermochemistry and Thermochemical Kinetics W. **2005**, 43–52.
- (9) Zhao, Y.; González-García, N.; Truhlar, D. G. Benchmark Database of Barrier Heights for Heavy Atom Transfer, Nucleophilic Substitution, Association, and Unimolecular Reactions and Its Use to Test Theoretical Methods. *J. Phys. Chem. A* **2005**, *109*, 2012–2018.
- (10) Guner, V.; Khuong, K. S.; Leach, A. G.; Lee, P. S.; Bartberger, M. D.; Houk, K. N. A Standard Set of Pericyclic Reactions of Hydrocarbons for the Benchmarking of Computational Methods: The Performance of Ab Initio, Density Functional, CASSCF, CASPT2, and CBS-QB3 Methods for the Prediction of Activation Barriers, Reaction

- Energetics, And. *J. Phys. Chem. A* **2003**, *107*, 11445–11459.
- (11) Ess, D. H.; Houk, K. N. Activation Energies of Pericyclic Reactions: Performance of DFT, MP2, and CBS-QB3 Methods for the Prediction of Activation Barriers and Reaction Energetics of 1,3-Dipolar Cycloadditions, and Revised Activation Enthalpies for a Standard Set of Hydrocarbon. *J. Phys. Chem. A* **2005**, *109*, 9542–9553.
  - (12) Dinadayalane, T. C.; Vijaya, R.; Smitha, A.; Sastry, G. N. Diels–Alder Reactivity of Butadiene and Cyclic Five-Membered Dienes ((CH)<sub>4</sub>X, X = CH<sub>2</sub>, SiH<sub>2</sub>, O, NH, PH, and S) with Ethylene: A Benchmark Study. *J. Phys. Chem. A* **2002**, *106*, 1627–1633.
  - (13) Steinmann, S. N.; Csonka, G.; Corminboeuf, C. Unified Inter- and Intramolecular Dispersion Correction Formula for Generalized Gradient Approximation Density Functional Theory. *J. Chem. Theory Comput.* **2009**, *5*, 2950–2958.
  - (14) Krieg, H.; Grimme, S. Thermochemical Benchmarking of Hydrocarbon Bond Separation Reaction Energies: Jacob’s Ladder Is Not Reversed! *Mol. Phys.* **2010**, *108*, 2655–2666.
  - (15) Kozuch, S.; Bachrach, S. M.; Martin, J. M. L. Conformational Equilibria in Butane-1,4-Diol: A Benchmark of a Prototypical System with Strong Intramolecular H-Bonds. *J. Phys. Chem. A* **2014**, *118*, 293–303.
  - (16) Sure, R.; Hansen, A.; Schwerdtfeger, P.; Grimme, S. Comprehensive Theoretical Study of All 1812 C<sub>60</sub>isomers. *Phys. Chem. Chem. Phys.* **2017**, *19*, 14296–14305.
  - (17) Yu, L.-J.; Karton, A. Assessment of Theoretical Procedures for a Diverse Set of Isomerization Reactions Involving Double-Bond Migration in Conjugated Dienes. *Chem. Phys.* **2014**, *441*, 166–177.
  - (18) Johnson, E. R.; Mori-Sánchez, P.; Cohen, A. J.; Yang, W. Delocalization Errors in Density Functionals and Implications for Main-Group Thermochemistry. *J. Chem. Phys.* **2008**, *129*, 204112.
  - (19) Zhao, Y.; Truhlar, D. G. The M06 Suite of Density Functionals for Main Group Thermochemistry, Thermochemical Kinetics, Noncovalent Interactions, Excited States, and Transition Elements: Two New Functionals and Systematic Testing of Four M06-Class Functionals and 12 Other Function. *Theor. Chem. Acc.* **2008**, *120*, 215–241.
  - (20) Grimme, S. Semiempirical Hybrid Density Functional with Perturbative Second-Order Correlation. *J. Chem. Phys.* **2006**, *124*, 034108.
  - (21) Grimme, S.; Mück-Lichtenfeld, C.; Würthwein, E. U.; Ehlers, A. W.; Goumans, T. P. M.; Lammertsma, K. Consistent Theoretical Description of 1,3-Dipolar Cycloaddition Reactions. *J. Phys. Chem. A* **2006**, *110*, 2583–2586.
  - (22) Piacenza, M.; Grimme, S. Systematic Quantum Chemical Study of DNA-Base Tautomers. *J. Comput. Chem.* **2004**, *25*, 83–98.
  - (23) Woodcock, H. L.; Schaefer, H. F.; Schreiner, P. R. Problematic Energy Differences between Cumulenes and Poly-Ynes: Does This Point to a Systematic Improvement of Density Functional Theory? *J. Phys. Chem. A* **2002**, *106*, 11923–11931.
  - (24) Schreiner, P. R.; Fokin, A. A.; Pascal, R. A.; de Meijere, A. Many Density Functional Theory Approaches Fail To Give Reliable Large Hydrocarbon Isomer Energy Differences. *Org. Lett.* **2006**, *8*, 3635–3638.
  - (25) Lepetit, C.; Chermette, H.; Heully, J.; Lyon, D.; Uni, V.; Umr, C. Description of Carbo - Oxocarbons and Assessment of Exchange-Correlation Functionals for the DFT Description of Carbo -Mers. **2007**, 136–149.
  - (26) Lee, J. S. Accurate Ab Initio Binding Energies of Alkaline Earth Metal Clusters. *J. Phys. Chem. A* **2005**, *109*, 11927–11932.

- (27) Karton, A.; Martin, J. M. L. Explicitly Correlated Benchmark Calculations on C<sub>8</sub>H<sub>8</sub> Isomer Energy Separations: How Accurate Are DFT, Double-Hybrid, and Composite Ab Initio Procedures? *Mol. Phys.* **2012**, *110*, 2477–2491.
- (28) Zhao, Y.; Tishchenko, O.; Gour, J. R.; Li, W.; Lutz, J. J.; Piecuch, P.; Truhlar, D. G. Thermochemical Kinetics for Multireference Systems: Addition Reactions of Ozone. *J. Phys. Chem. A* **2009**, *113*, 5786–5799.
- (29) Manna, D.; Martin, J. M. L. What Are the Ground State Structures of C<sub>20</sub> and C<sub>24</sub>? An Explicitly Correlated Ab Initio Approach. **2016**.
- (30) Friedrich, J.; Hänchen, J. Incremental CCSD(T)(F12\*)|MP2: A Black Box Method To Obtain Highly Accurate Reaction Energies. *J. Chem. Theory Comput.* **2013**, *9*, 5381–5394.
- (31) Friedrich, J. Efficient Calculation of Accurate Reaction Energies - Assessment of Different Models in Electronic Structure Theory. *J. Chem. Theory Comput.* **2015**, *11*, 3596–3609.
- (32) Curtiss, L. A.; Raghavachari, K.; Trucks, G. W.; Pople, J. A. Gaussian-2 Theory for Molecular Energies of First- and Second-row Compounds. *J. Chem. Phys.* **1991**, *94*, 7221–7230.
- (33) Curtiss, L. A.; Raghavachari, K.; Redfern, P. C.; Pople, J. A. Assessment of Gaussian-2 and Density Functional Theories for the Computation of Enthalpies of Formation. *J. Chem. Phys.* **1997**, *106*, 1063–1079.
- (34) Kozuch, S.; Martin, J. M. L. Halogen Bonds: Benchmarks and Theoretical Analysis. *J. Chem. Theory Comput.* **2013**, *9*, 1918–1931.
- (35) Řezáč, J.; Riley, K. E.; Hobza, P. Benchmark Calculations of Noncovalent Interactions of Halogenated Molecules. *J. Chem. Theory Comput.* **2012**, *8*, 4285–4292.
- (36) Schwabe, T.; Grimme, S. Double-Hybrid Density Functionals with Long-Range Dispersion Corrections: Higher Accuracy and Extended Applicability. *Phys. Chem. Chem. Phys.* **2007**, *9*, 3397–3406.
- (37) Grimme, S. Seemingly Simple Stereoelectronic Effects in Alkane Isomers and the Implications for Kohn–Sham Density Functional Theory. *Angew. Chemie Int. Ed.* **2006**, *45*, 4460–4464.
- (38) Goerigk, L.; Grimme, S. Efficient and Accurate Double-Hybrid-Meta-GGA Density Functionals—Evaluation with the Extended GMTKN30 Database for General Main Group Thermochemistry, Kinetics, and Noncovalent Interactions. *J. Chem. Theory Comput.* **2011**, *7*, 291–309.
- (39) Grimme, S.; Steinmetz, M.; Korth, M. How to Compute Isomerization Energies of Organic Molecules with Quantum Chemical Methods. *J. Org. Chem.* **2007**, *72*, 2118–2126.
- (40) Goerigk, L.; Sharma, R. The INV24 Test Set: How Well Do Quantum-Chemical Methods Describe Inversion and Racemization Barriers? *Can. J. Chem.* **2016**, *94*, 1133–1143.
- (41) Huenerbein, R.; Schirmer, B.; Moellmann, J.; Grimme, S. Effects of London Dispersion on the Isomerization Reactions of Large Organic Molecules: A Density Functional Benchmark Study. *Phys. Chem. Chem. Phys.* **2010**, *12*, 6940.
- (42) Fogueri, U. R.; Kozuch, S.; Karton, A.; Martin, J. M. L. The Melatonin Conformer Space: Benchmark and Assessment of Wave Function and DFT Methods for a Paradigmatic Biological and Pharmacological Molecule. *J. Phys. Chem. A* **2013**, *117*, 2269–2277.
- (43) Grimme, S.; Kruse, H.; Goerigk, L.; Erker, G. The Mechanism of Dihydrogen Activation



- by Frustrated Lewis Pairs Revisited. *Angew. Chemie Int. Ed.* **2010**, *49*, 1402–1405.
- (44) Setiawan, D.; Kraka, E.; Cremer, D. Strength of the Pnictogen Bond in Complexes Involving Group Va Elements N, P, and As. *J. Phys. Chem. A* **2015**, *119*, 1642–1656.
- (45) Karton, A.; O'Reilly, R. J.; Chan, B.; Radom, L. Determination of Barrier Heights for Proton Exchange in Small Water, Ammonia, and Hydrogen Fluoride Clusters with G4(MP2)-Type, MPn, and SCS-MPn Procedures—a Caveat. *J. Chem. Theory Comput.* **2012**, *8*, 3128–3136.
- (46) Neese, F.; Schwabe, T.; Kossmann, S.; Schirmer, B.; Grimme, S. Assessment of Orbital-Optimized, Spin-Component Scaled Second-Order Many-Body Perturbation Theory for Thermochemistry and Kinetics. *J. Chem. Theory Comput.* **2009**, *5*, 3060–3073.
- (47) Jurečka, P.; Šponer, J.; Černý, J.; Hobza, P. Benchmark Database of Accurate (MP2 and CCSD(T) Complete Basis Set Limit) Interaction Energies of Small Model Complexes, DNA Base Pairs, and Amino Acid Pairs. *Phys. Chem. Chem. Phys.* **2006**, *8*, 1985–1993.
- (48) Rezáč, J.; Riley, K. E.; Hobza, P. S66: A Well-Balanced Database of Benchmark Interaction Energies Relevant to Biomolecular Structures. *J. Chem. Theory Comput.* **2011**, *7*, 2427–2438.
- (49) Csonka, G. I.; French, A. D.; Johnson, G. P.; Stortz, C. A. Evaluation of Density Functionals and Basis Sets for Carbohydrates. *J. Chem. Theory Comput.* **2009**, *5*, 679–692.
- (50) Karton, A.; Rabinovich, E.; Martin, J. M. L.; Ruscic, B. W4 Theory for Computational Thermochemistry: In Pursuit of Confident Sub-KJ/Mol Predictions. *J. Chem. Phys.* **2006**, *125*, 144108.
- (51) Kruse, H.; Mladek, A.; Gkionis, K.; Hansen, A.; Grimme, S.; Sponer, J. Quantum Chemical Benchmark Study on 46 RNA Backbone Families Using a Dinucleotide Unit. *J. Chem. Theory Comput.* **2015**, *11*, 4972–4991.
- (52) Karton, A.; Daon, S.; Martin, J. M. L. W4-11: A High-Confidence Benchmark Dataset for Computational Thermochemistry Derived from First-Principles W4 Data. *Chem. Phys. Lett.* **2011**, *510*, 165–178.
- (53) Bryantsev, V. S.; Diallo, M. S.; van Duin, A. C. T.; Goddard, W. A. Evaluation of B3LYP, X3LYP, and M06-Class Density Functionals for Predicting the Binding Energies of Neutral, Protonated, and Deprotonated Water Clusters. *J. Chem. Theory Comput.* **2009**, *5*, 1016–1026.
- (54) Karton, A.; O'Reilly, R. J.; Radom, L. Assessment of Theoretical Procedures for Calculating Barrier Heights for a Diverse Set of Water-Catalyzed Proton-Transfer Reactions. *J. Phys. Chem. A* **2012**, *116*, 4211–4221.
- (55) Zhao, Y.; Ng, H. T.; Peverati, R.; Truhlar, D. G. Benchmark Database for Ylidic Bond Dissociation Energies and Its Use for Assessments of Electronic Structure Methods. *J. Chem. Theory Comput.* **2012**, *8*, 2824–2834.
- (56) Caldeweyher, E.; Ehlert, S.; Hansen, A.; Neugebauer, H.; Spicher, S.; Bannwarth, C.; Grimme, S. A Generally Applicable Atomic-Charge Dependent London Dispersion Correction. *J. Chem. Phys.* **2019**, *150*, 154122.
- (57) Caldeweyher, E.; Bannwarth, C.; Grimme, S. Extension of the D3 Dispersion Coefficient Model. *J. Chem. Phys.* **2017**, *147*, 034112.
